# Supplementary material
Source: PubMed Central journal article supplement (PMC4249402)
Supplement: AAC.03845-14_zac011143403so1.pdf [file AAC.03845-14_zac011143403so1.pdf]

## SUPPLEMENTARY TABLES

**Table S1. Baseline characteristics after inverse probability weighting**

| Characteristic                                          | LAM/ETV-R group<br>(n=45) | LAM/ADV-R group<br>(n=28) | LAM/ETV/ADV-R group<br>(n=20) | <i>P</i> value* |
|---------------------------------------------------------|---------------------------|---------------------------|-------------------------------|-----------------|
| Age (years)                                             | 53 (32–71)                | 50 (23–68)                | 47 (29–67)                    | 0.433           |
| Gender, male                                            | 32.2 (74.9)               | 14.8 (50.9)               | 10.4 (79.2)                   | 0.063           |
| Serum HBV DNA (log <sub>10</sub> IU/mL) <sup>†</sup>    | 3.32 (0.87–7.37)          | 3.20 (1.88–6.71)          | 2.51 (2.02–8.23)              | 0.801           |
| Serum ALT (IU/L) <sup>†</sup>                           | 25 (9–275)                | 29 (11–843)               | 26 (14–57)                    | 0.441           |
| Serum creatinine (mg/dL) <sup>†</sup>                   | 0.88 (0.53–1.26)          | 0.80 (0.53–1.31)          | 0.85 (0.54–1.14)              | 0.328           |
| HBeAg, positive                                         | 31.8 (74.0)               | 22.2 (76.4)               | 11.1 (83.8)                   | 0.763           |
| Liver cirrhosis <sup>‡</sup>                            | 12.0 (27.9)               | 7.5 (25.7)                | 2.5 (18.8)                    | 0.805           |
| Lines of prior antiviral treatment                      | 3 (1–5)                   | 3 (2–5)                   | 4 (3–5)                       | 0.065           |
| Duration of previous treatment<br>(months) <sup>†</sup> | 16.9 (2.7–78.7)           | 15.4 (2.7–85.7)           | 18.2 (1.4–40.2)               | 0.507           |
| Time point of rescue therapy                            |                           |                           |                               |                 |

|                          |             |            |            |       |
|--------------------------|-------------|------------|------------|-------|
| Virologic breakthrough   | 18.4 (42.9) | 8.3 (28.5) | 2.3 (17.3) | 0.170 |
| Biochemical breakthrough | 11.1 (25.8) | 9.7 (33.6) | 2.1 (15.6) | 0.462 |

---

Note.—Unless otherwise indicated, data are number of patients and data in parentheses are percentages.

\* Kruskal-Wallis test and  $\chi^2$  test (or the Fisher's exact test) were used to analyze the differences among the groups.

† Data are medians, and data in parentheses are ranges.

‡ Liver cirrhosis was diagnosed when the platelet count was below 100,000/mm<sup>3</sup> and associated splenomegaly or esophageal-gastric varices were detected.

Abbreviations: LAM, lamivudine; ETV, entecavir; ADV, adefovir; HBV, hepatitis B virus; ALT, alanine aminotransferase; HBeAg, hepatitis B e antigen

**Table S2. Univariate and multivariate analysis of the clinical factors predictive of complete virologic suppression during rescue therapy after inverse probability weighting**

| Variable                                                | Univariate analysis |                  | Multivariate analysis |                  |
|---------------------------------------------------------|---------------------|------------------|-----------------------|------------------|
|                                                         | Hazard ratio        | <i>P</i> value * | Adjusted hazard ratio | <i>P</i> value * |
| Age (per year)                                          | 1.016 (0.987–1.046) | 0.271            |                       |                  |
| Baseline serum HBV DNA (per 1 log <sub>10</sub> IU/mL)  | 0.667 (0.566–0.785) | <0.001           | 0.676 (0.557–0.820)   | <0.001           |
| Baseline serum ALT (per IU/L)                           | 0.992 (0.983–1.000) | 0.045            | 1.000 (0.995–1.006)   | 0.914            |
| HBeAg (positive versus negative)                        | 0.628 (0.369–1.068) | 0.086            |                       |                  |
| Liver cirrhosis (positive versus negative) <sup>†</sup> | 1.438 (0.852–2.427) | 0.174            |                       |                  |
| Time point of rescue therapy                            |                     |                  |                       |                  |
| Virologic breakthrough (yes versus no)                  | 1.308 (0.800–2.138) | 0.284            |                       |                  |
| Biochemical breakthrough (yes versus no)                | 0.437 (0.236–0.807) | 0.008            | 0.874 (0.401–1.904)   | 0.735            |
| Drug resistance                                         |                     |                  |                       |                  |
| LAM/ETV-R versus LAM/ADV-R                              | 0.846 (0.496–1.445) | 0.541            |                       |                  |
| LAM/ETV-R versus LAM/ETV/ADV-R                          | 0.690 (0.364–1.308) | 0.255            |                       |                  |

|                                |                     |       |
|--------------------------------|---------------------|-------|
| LAM/ADV-R versus LAM/ETV/ADV-R | 0.815 (0.415–1.598) | 0.551 |
|--------------------------------|---------------------|-------|

---

Note.—Data in parentheses are 95% CIs.

\* *P* values were determined with Cox proportional hazards regression models. *P* < 0.05 indicated a significant difference.

† Liver cirrhosis was diagnosed when the platelet count was below 100,000/mm<sup>3</sup> and associated splenomegaly or esophageal-gastric varices were detected.

Abbreviations: HBV, hepatitis B virus; ALT, alanine aminotransferase; HBeAg, hepatitis B e antigen; LAM, lamivudine; ETV, entecavir; ADV, adefovir

**SUPPLEMENTARY FIGURES**

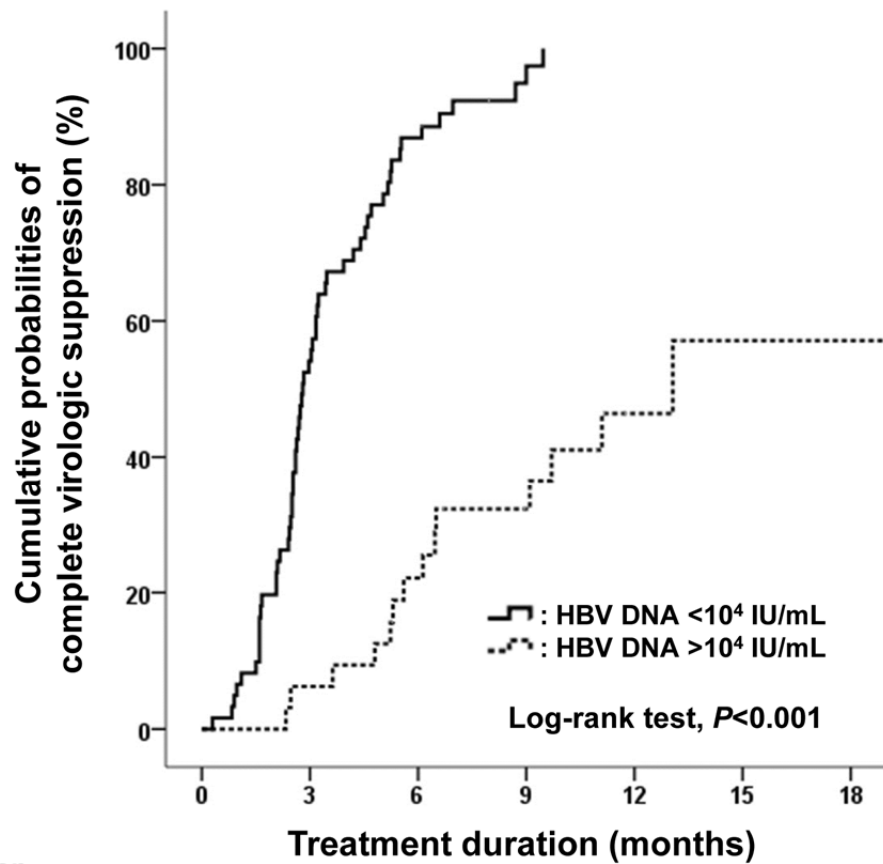

**No. under observation**

|                                            |    |    |    |    |    |    |   |
|--------------------------------------------|----|----|----|----|----|----|---|
| HBV DNA <10 <sup>4</sup> IU/mL at baseline | 61 | 61 | 61 | 48 | 32 | 11 | 5 |
| HBV DNA >10 <sup>4</sup> IU/mL at baseline | 32 | 32 | 32 | 25 | 21 | 10 | 9 |

**Fig. S1. Cumulative probability of complete virologic suppression during the rescue therapy.**

Cumulative probabilities of complete virologic suppression, undetectable levels of HBV DNA according to PCR assays, during the treatment period, are plotted for those with low (<10<sup>4</sup> IU/mL), and high HBV DNA levels (>10<sup>4</sup> IU/mL) at baseline.

**A**

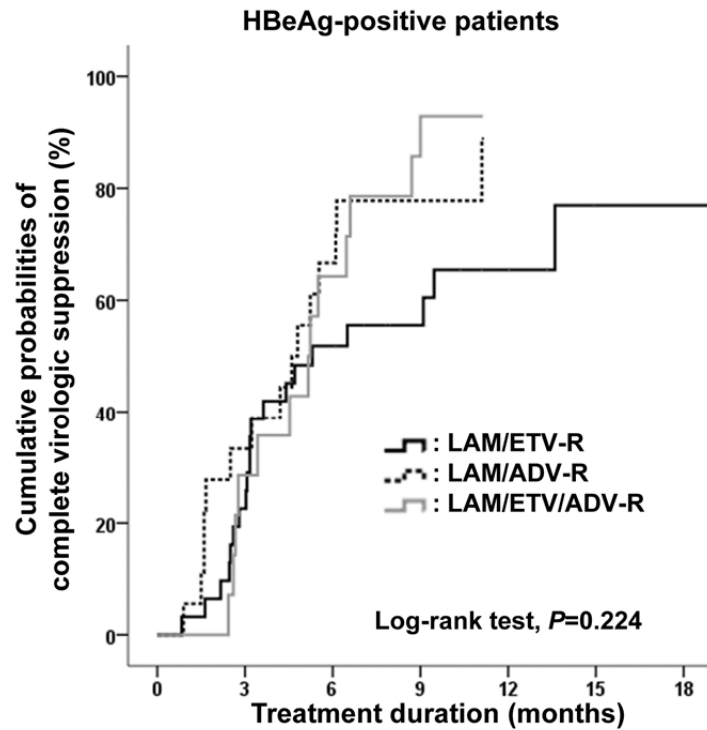

No. under observation

|               |    |    |    |    |    |   |   |
|---------------|----|----|----|----|----|---|---|
| LAM/ETV-R     | 31 | 31 | 31 | 23 | 13 | 4 | 3 |
| LAM/ADV-R     | 18 | 18 | 18 | 16 | 16 | 7 | 3 |
| LAM/ETV/ADV-R | 14 | 14 | 14 | 13 | 12 | 3 | 3 |

**B**

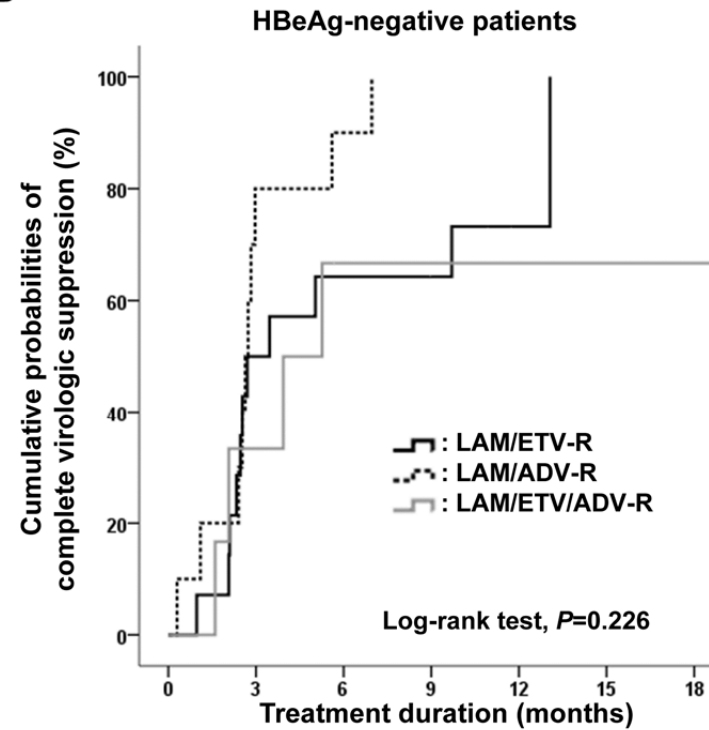

No. under observation

|               |    |    |    |   |   |   |   |
|---------------|----|----|----|---|---|---|---|
| LAM/ETV-R     | 14 | 14 | 14 | 9 | 5 | 2 | 2 |
| LAM/ADV-R     | 10 | 10 | 10 | 7 | 3 | 2 | 1 |
| LAM/ETV/ADV-R | 6  | 6  | 6  | 5 | 4 | 3 | 2 |

**Fig. S2. Cumulative probability of complete virologic suppression during the rescue therapy.** Cumulative probabilities of complete virologic suppression are shown for each group. (A) Data for patients who were positive for HBeAg at baseline. (B) Data for patients who were negative for HBeAg at baseline.

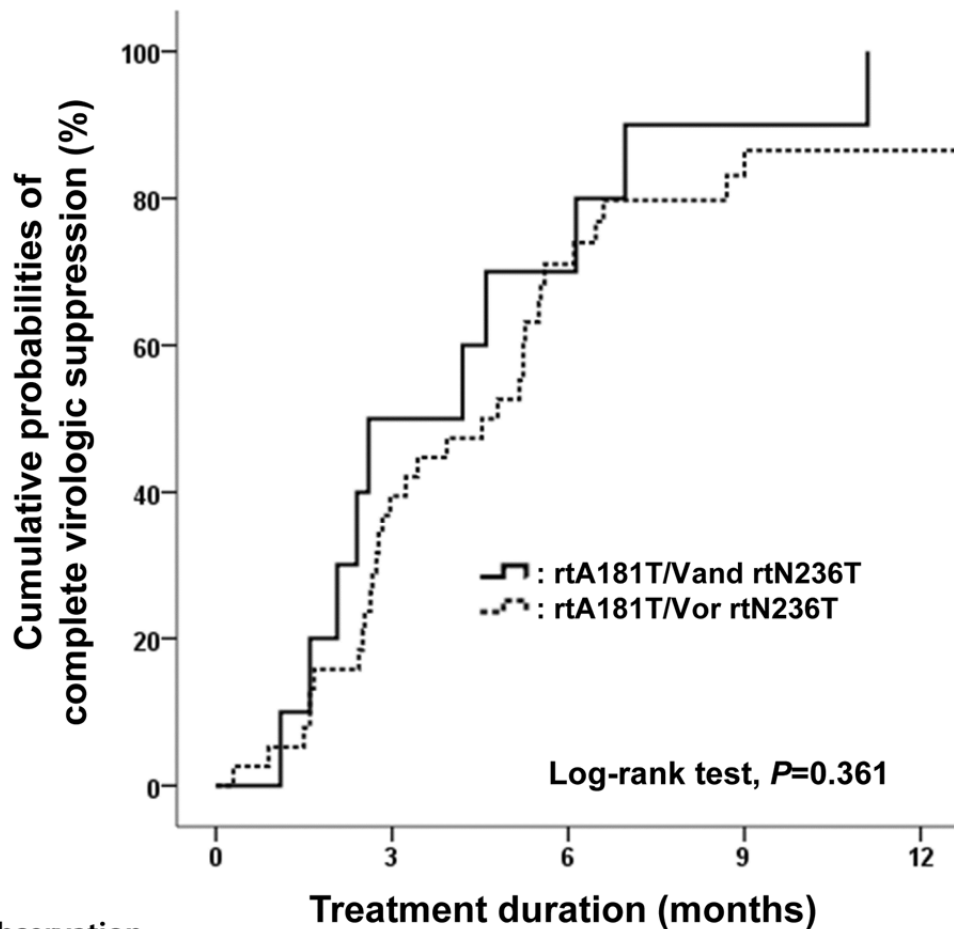

No. under observation

|                       |    |    |    |    |    |
|-----------------------|----|----|----|----|----|
| rtA181T/V and rtN236T | 10 | 10 | 10 | 9  | 9  |
| rtA181T/V or rtN236T  | 38 | 38 | 38 | 32 | 26 |

**Fig. S3. Cumulative probability of complete virologic suppression in patients harboring substitutions associated with ADV-resistance at baseline.** Cumulative probabilities of complete virologic suppression during the treatment period are shown according to amino acid substitution profiles.
